# Supplementary material for: Construction of a Novel Three-Dimensional PEDOT/RVC Electrode Structure for Capacitive Deionization: Testing and Performance
Source: PubMed Central journal article supplement (PMC5551889; doi:10.3390/ma10070847), 2017-07-24
Supplement: materials-10-00847-s001.pdf [file materials-10-00847-s001.pdf]

## Supplementary Materials: Construction of a Novel Three-Dimensional PEDOT/RVC Electrode Structure for Capacitive Deionization: Testing and Performance

Ali Aldalbahi, Mostafizur Rahaman, Periyasami Govindasami, Mohammed Almoiqli, Tariq Altalhi and Amine Mezni

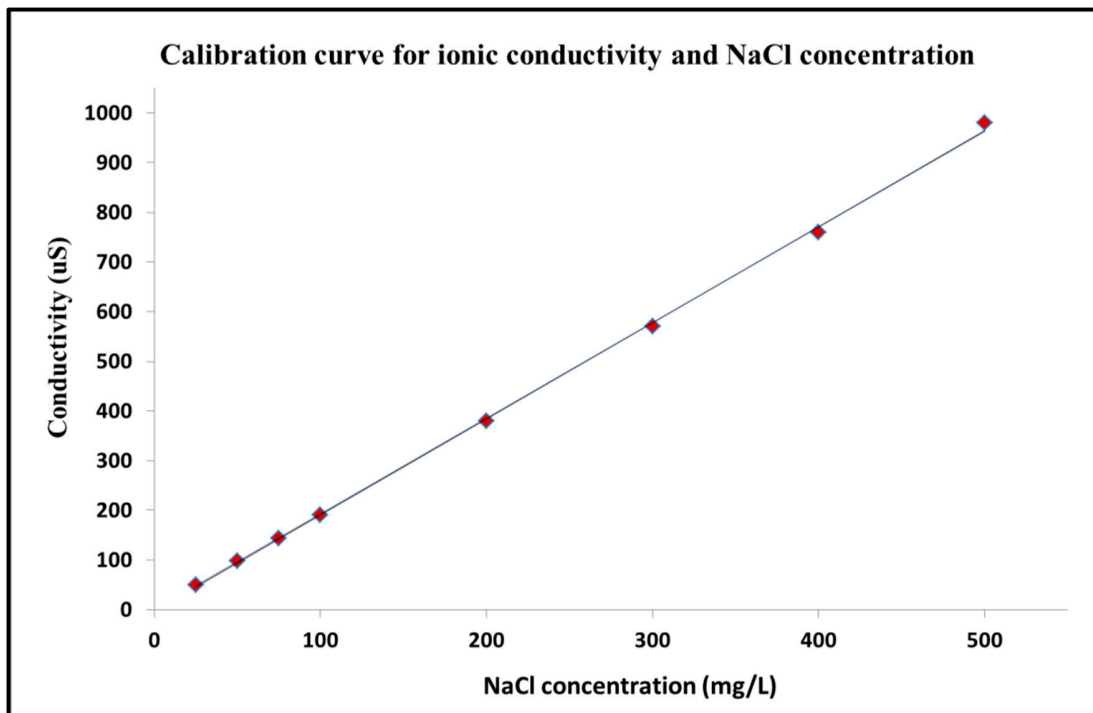

Figure S1. Calibration curve linearity for ionic conductivity vs NaCl concentration.

### Calculation of the Ion Removal from NaCl Solution

The conductivity of the solution is measured by the conductivity meter. If the initial NaCl solution conductivity is 143.00  $\mu\text{S}/\text{cm}$  and after charging the electrode it became 138.59  $\mu\text{S}/\text{cm}$ , then the ion removal from the solution can be calculated. As we know from equation 1 that;

Conductivity = 1.9067 \* Concentration; and hence

Concentration = Conductivity/1.9067

Therefore, Initial concentration = (143.00)/1.9067= 75.00 mg/L and

Final concentration = (138.59)/1.9067= 72.69 mg/L.

Hence, the ion removal from the NaCl solution = Initial concentration – Final concentration = 2.31 mg/L.

### **Calculation of Electrode Electrosorption Capacity in Terms of (mg/g) and (mg/cm<sup>3</sup>)**

If the mass of electrode is 0.05 g (having 2.16 cm<sup>3</sup> geometric volume and 17.88 cm<sup>2</sup> geometric area); volume (v) and conductivity of NaCl solution are 0.06 L and 143.00 μS/cm, respectively; and conductivity of NaCl solution after adsorption is 138.59 μS/cm, then the electrosorption capacities of the electrodes can be calculated. From the above section, we have;

Initial concentration,  $C_0 = 75.00$  mg/L and Final concentration,  $C_f = 72.69$  mg/L.

Therefore from equation 2, we have;  $M_{\text{mass}} = [(C_0 - C_f) * V] / m$

$$\text{so, } M_{\text{mass}} = [(75 - 72.69) * 0.06] / 0.05 = 2.77 \text{ mg/g}$$

Or from equation 3, we have;  $M_{\text{volume}} = [(C_0 - C_f) * V] / Z$

$$\text{so, } M_{\text{volume}} = [(75 - 72.69) * 0.06] / 2.16 = 0.06 \text{ mg/cm}^3$$

Or from equation 4, we have;  $M_{\text{area}} = [(C_0 - C_f) * V] / Z$

$$\text{so, } M_{\text{area}} = [(75 - 72.69) * 0.06] / 17.88 = 0.008 \text{ mg/cm}^2$$
